# Supplementary material
Source: PubMed Central journal article supplement (PMC3265968)
Supplement: NIHMS241943-supplement-Appendix_C__Additional_text_region_detection_examples.pdf [file NIHMS241943-supplement-Appendix_C__Additional_text_region_detection_examples.pdf]

# A New Pivoting and Iterative Text Detection Algorithm for Biomedical Images: Appendix C

---

---

Below we will show more text detection examples.

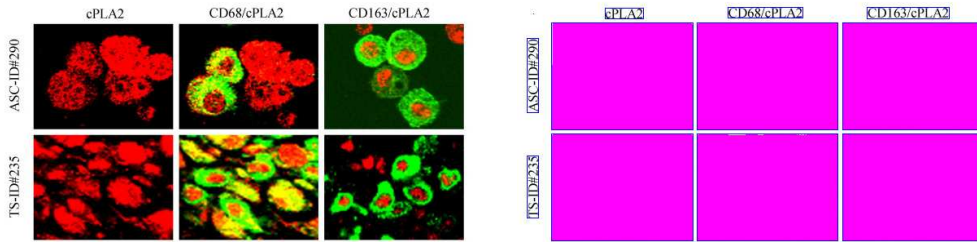

(a) The original image

(b) Text detection result after the 1st round, i.e. the final result

Figure 1: A text detection example from [9].

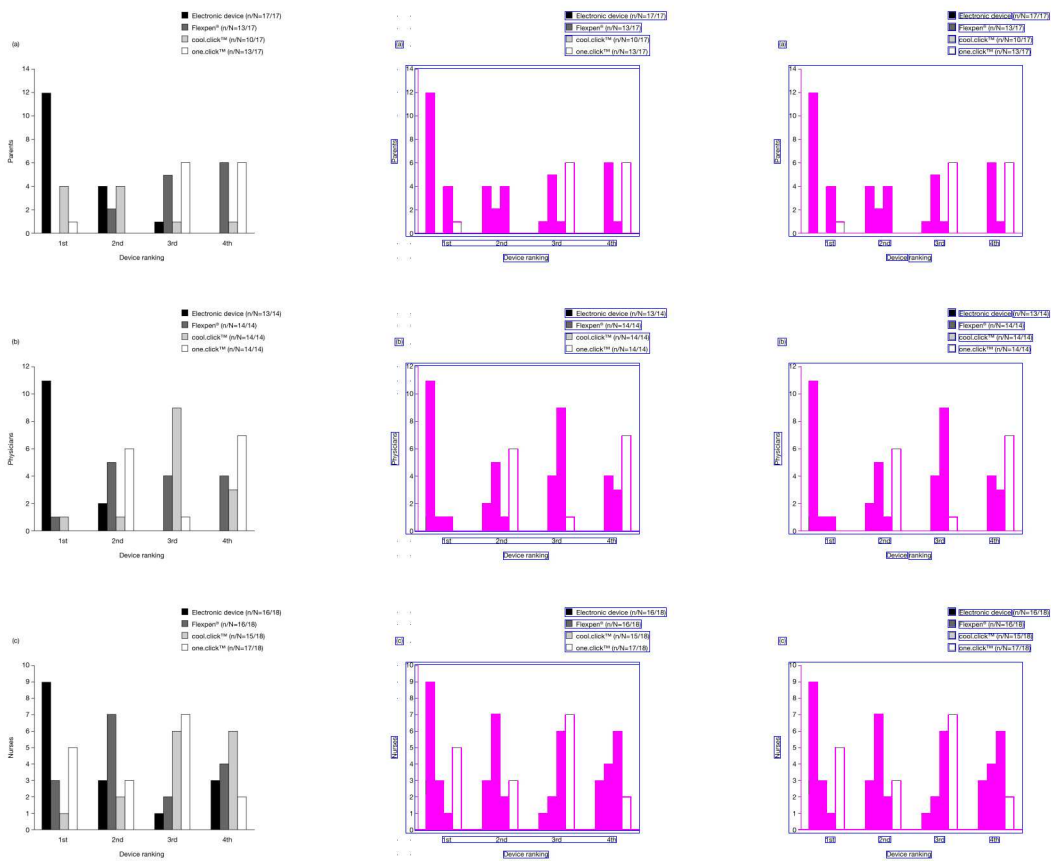

(a) The original image

(b) Text detection result after the 1st round

(c) The final text detection result

Figure 2: A text detection example from [3].

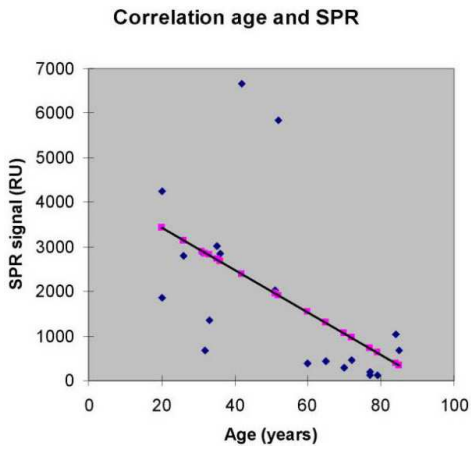

(a) The original image

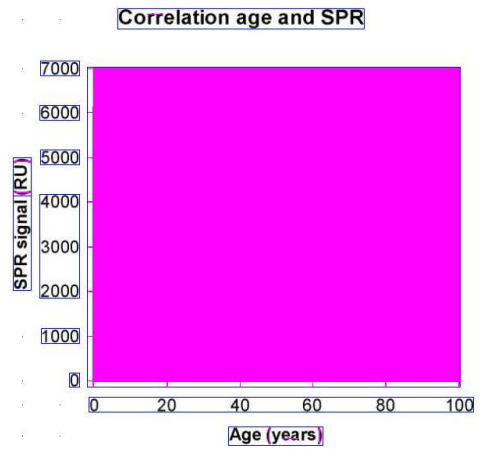

(b) Text detection result after the 1st round

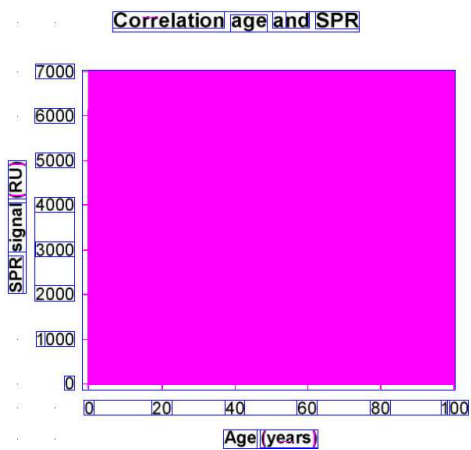

(c) Text detection result after the 2nd round

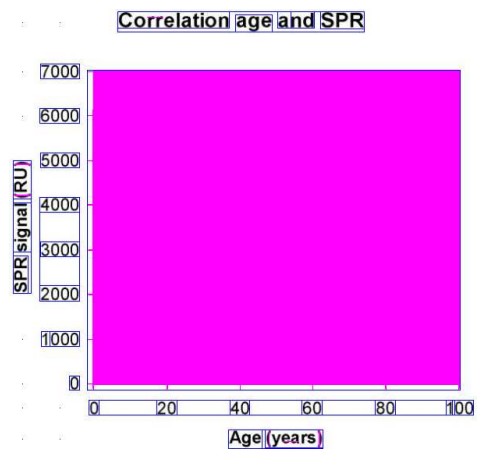

(d) Text detection result after the 3rd round

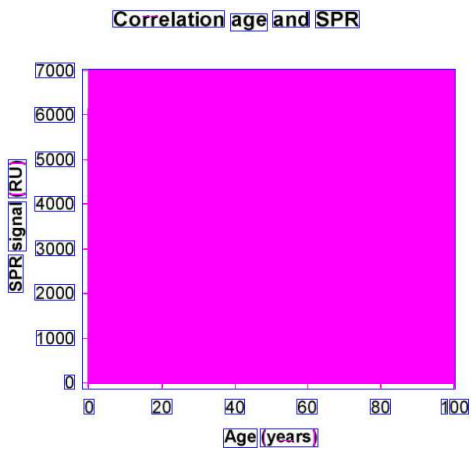

(e) The final text detection result

Figure 3: A text detection example from [7].

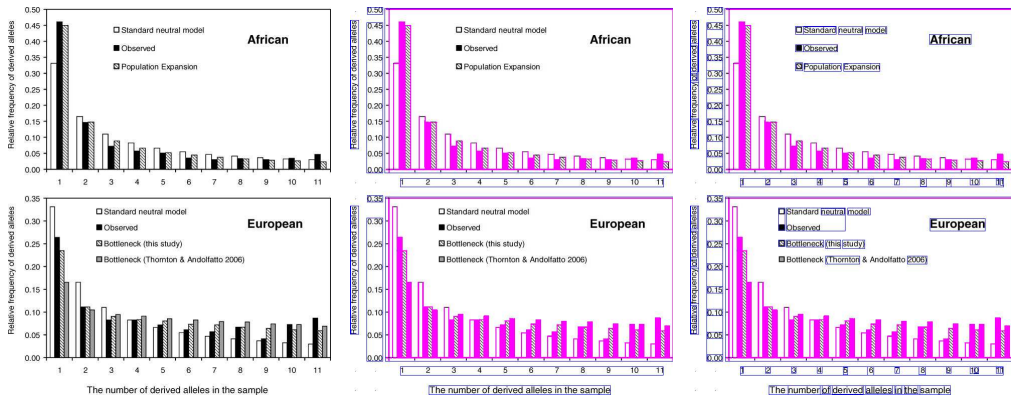

(a) The original image (b) Text detection result (c) Text detection result

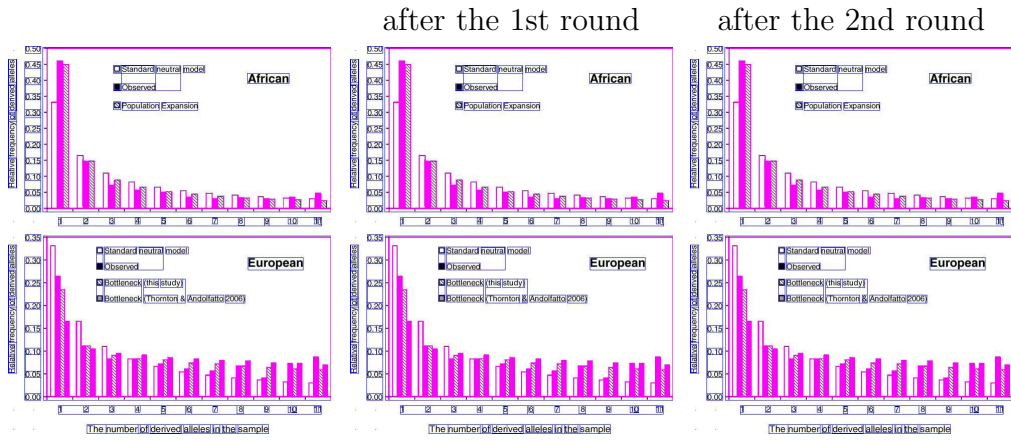

(d) Text detection result after the 1st round (e) Text detection result after the 2nd round (f) Text detection result after the 3rd round

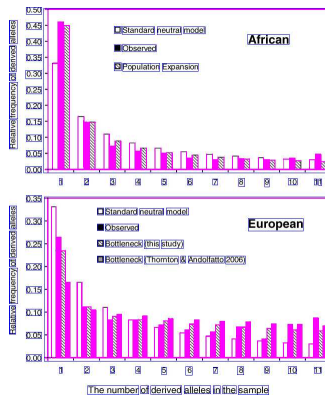

(g) The final text detection result

Figure 4: A text detection example from [4].

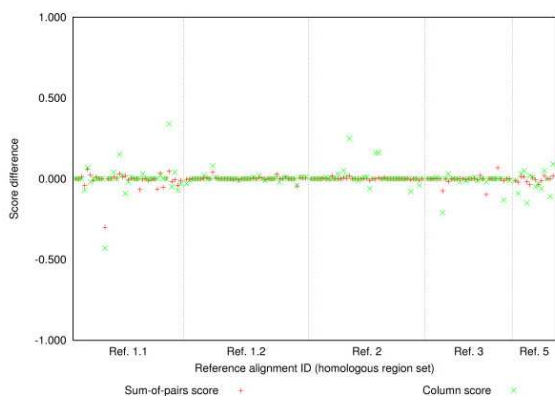

(a) The original image

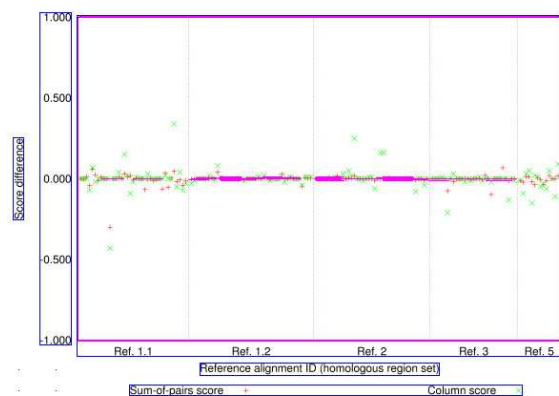

(b) Text detection result after the 1st round

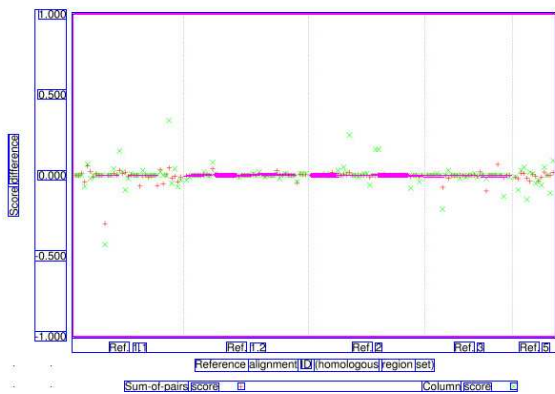

(c) Text detection result after the 2nd round

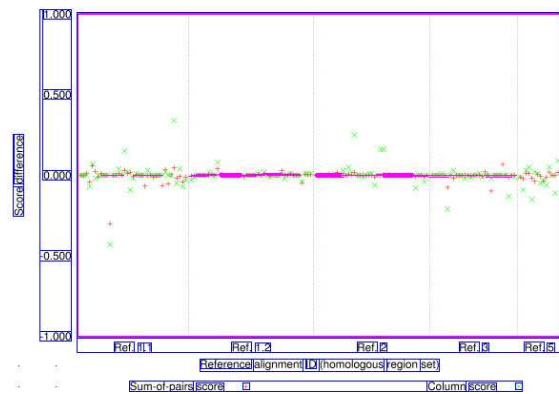

(d) Text detection result after the 3rd round

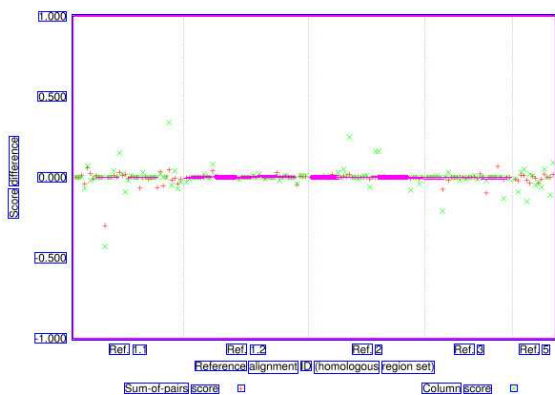

(e) The final text detection result

Figure 5: A text detection example from [10].

a) Common ESTs between SSH and microarray for each comparison

| Comparison | 1332/1332 bm3 | 5361/5361 bm3 | F2/ F2 bm1 | F2/ F2 bm2 | F2/ F2 bm3 | FD-pop | DD1-pop | DD2-pop | AS 20/ AS 21 |
|------------|---------------|---------------|------------|------------|------------|--------|---------|---------|--------------|
| EST number | 49            | 102           | 42         | 43         | 25         | 34     | 8       | 33      | 31           |

b) Differentially expressed ESTs with at least five-fold change for each comparison

| Comparison | 1332/1332 bm3 | 5361/5361 bm3 | F2/ F2 bm1 | F2/ F2 bm2 | F2/ F2 bm3 | FD-pop | DD1-pop | DD2-pop | AS 20/ AS 21 |
|------------|---------------|---------------|------------|------------|------------|--------|---------|---------|--------------|
| EST number | 18            | 90            | 25         | 30         | 83         | 42     | 78      | 42      | 80           |

c) EST homologs of the genes involved in lignin biosynthesis pathway

| Lignin gene | PAL | 4CL | C3H | CcCoAOMT | CCR | COMT | CAD |
|-------------|-----|-----|-----|----------|-----|------|-----|
| EST number  | 10  | 22  | 9   | 5        | 19  | 18   | 17  |

d) *In silico* mapped ESTs located in chromosome 5, 1, and 4

| Chromosome | 1  | 4  | 5  |
|------------|----|----|----|
| EST number | 95 | 47 | 26 |

e) Commonly differentially expressed ESTs in all three bm3-isogenic comparisons (1332/1332 bm3, 5361/5361 bm3, and F2/F2 bm3)

f) Commonly differentially expressed ESTs in all three isogenic comparisons (bm1, bm2, bm3) in F2 background

g) Commonly differentially expressed ESTs in FD, DD1, and DD2 mapping populations

(a) The original image

a) Common ESTs between SSH and microarray for each comparison

| Comparison | 1332/1332 bm3 | 5361/5361 bm3 | F2/ F2 bm1 | F2/ F2 bm2 | F2/ F2 bm3 | FD-pop | DD1-pop | DD2-pop | AS 20/ AS 21 |
|------------|---------------|---------------|------------|------------|------------|--------|---------|---------|--------------|
| EST number | 49            | 102           | 42         | 43         | 25         | 34     | 8       | 33      | 31           |

b) Differentially expressed ESTs with at least five-fold change for each comparison

| Comparison | 1332/1332 bm3 | 5361/5361 bm3 | F2/ F2 bm1 | F2/ F2 bm2 | F2/ F2 bm3 | FD-pop | DD1-pop | DD2-pop | AS 20/ AS 21 |
|------------|---------------|---------------|------------|------------|------------|--------|---------|---------|--------------|
| EST number | 18            | 90            | 25         | 30         | 83         | 42     | 78      | 42      | 80           |

c) EST homologs of the genes involved in lignin biosynthesis pathway

| Lignin gene | PAL | 4CL | C3H | CcCoAOMT | CCR | COMT | CAD |
|-------------|-----|-----|-----|----------|-----|------|-----|
| EST number  | 10  | 22  | 9   | 5        | 19  | 18   | 17  |

d) *In silico* mapped ESTs located in chromosome 5, 1, and 4

| Chromosome | 1  | 4  | 5  |
|------------|----|----|----|
| EST number | 95 | 47 | 26 |

e) Commonly differentially expressed ESTs in all three bm3-isogenic comparisons (1332/1332 bm3, 5361/5361 bm3, and F2/F2 bm3)

f) Commonly differentially expressed ESTs in all three isogenic comparisons (bm1, bm2, bm3) in F2 background

g) Commonly differentially expressed ESTs in FD, DD1, and DD2 mapping populations

(b) Text detection result after the 1st round

a) Common ESTs between SSH and microarray for each comparison

| Comparison | 1332/1332 bm3 | 5361/5361 bm3 | F2/ F2 bm1 | F2/ F2 bm2 | F2/ F2 bm3 | FD-pop | DD1-pop | DD2-pop | AS 20/ AS 21 |
|------------|---------------|---------------|------------|------------|------------|--------|---------|---------|--------------|
| EST number | 49            | 102           | 42         | 43         | 25         | 34     | 8       | 33      | 31           |

b) Differentially expressed ESTs with at least five-fold change for each comparison

| Comparison | 1332/1332 bm3 | 5361/5361 bm3 | F2/ F2 bm1 | F2/ F2 bm2 | F2/ F2 bm3 | FD-pop | DD1-pop | DD2-pop | AS 20/ AS 21 |
|------------|---------------|---------------|------------|------------|------------|--------|---------|---------|--------------|
| EST number | 18            | 90            | 25         | 30         | 83         | 42     | 78      | 42      | 80           |

c) EST homologs of the genes involved in lignin biosynthesis pathway

| Lignin gene | PAL | 4CL | C3H | CcCoAOMT | CCR | COMT | CAD |
|-------------|-----|-----|-----|----------|-----|------|-----|
| EST number  | 10  | 22  | 9   | 5        | 19  | 18   | 17  |

d) *In silico* mapped ESTs located in chromosome 5, 1, and 4

| Chromosome | 1  | 4  | 5  |
|------------|----|----|----|
| EST number | 95 | 47 | 26 |

e) Commonly differentially expressed ESTs in all three bm3-isogenic comparisons (1332/1332 bm3, 5361/5361 bm3, and F2/F2 bm3)

f) Commonly differentially expressed ESTs in all three isogenic comparisons (bm1, bm2, bm3) in F2 background

g) Commonly differentially expressed ESTs in FD, DD1, and DD2 mapping populations

(c) Text detection result after the 2nd round

a) Common ESTs between SSH and microarray for each comparison

| Comparison | 1332/1332 bm3 | 5361/5361 bm3 | F2/ F2 bm1 | F2/ F2 bm2 | F2/ F2 bm3 | FD-pop | DD1-pop | DD2-pop | AS 20/ AS 21 |
|------------|---------------|---------------|------------|------------|------------|--------|---------|---------|--------------|
| EST number | 49            | 102           | 42         | 43         | 25         | 34     | 8       | 33      | 31           |

b) Differentially expressed ESTs with at least five-fold change for each comparison

| Comparison | 1332/1332 bm3 | 5361/5361 bm3 | F2/ F2 bm1 | F2/ F2 bm2 | F2/ F2 bm3 | FD-pop | DD1-pop | DD2-pop | AS 20/ AS 21 |
|------------|---------------|---------------|------------|------------|------------|--------|---------|---------|--------------|
| EST number | 18            | 90            | 25         | 30         | 83         | 42     | 78      | 42      | 80           |

c) EST homologs of the genes involved in lignin biosynthesis pathway

| Lignin gene | PAL | 4CL | C3H | CcCoAOMT | CCR | COMT | CAD |
|-------------|-----|-----|-----|----------|-----|------|-----|
| EST number  | 10  | 22  | 9   | 5        | 19  | 18   | 17  |

d) *In silico* mapped ESTs located in chromosome 5, 1, and 4

| Chromosome | 1  | 4  | 5  |
|------------|----|----|----|
| EST number | 95 | 47 | 26 |

e) Commonly differentially expressed ESTs in all three bm3-isogenic comparisons (1332/1332 bm3, 5361/5361 bm3, and F2/F2 bm3)

f) Commonly differentially expressed ESTs in all three isogenic comparisons (bm1, bm2, bm3) in F2 background

g) Commonly differentially expressed ESTs in FD, DD1, and DD2 mapping populations

(d) Text detection result after the 3rd round

a) Common ESTs between SSH and microarray for each comparison

| Comparison | 1332/1332 bm3 | 5361/5361 bm3 | F2/ F2 bm1 | F2/ F2 bm2 | F2/ F2 bm3 | FD-pop | DD1-pop | DD2-pop | AS 20/ AS 21 |
|------------|---------------|---------------|------------|------------|------------|--------|---------|---------|--------------|
| EST number | 49            | 102           | 42         | 43         | 25         | 34     | 8       | 33      | 31           |

b) Differentially expressed ESTs with at least five-fold change for each comparison

| Comparison | 1332/1332 bm3 | 5361/5361 bm3 | F2/ F2 bm1 | F2/ F2 bm2 | F2/ F2 bm3 | FD-pop | DD1-pop | DD2-pop | AS 20/ AS 21 |
|------------|---------------|---------------|------------|------------|------------|--------|---------|---------|--------------|
| EST number | 18            | 90            | 25         | 30         | 83         | 42     | 78      | 42      | 80           |

c) EST homologs of the genes involved in lignin biosynthesis pathway

| Lignin gene | PAL | 4CL | C3H | CcCoAOMT | CCR | COMT | CAD |
|-------------|-----|-----|-----|----------|-----|------|-----|
| EST number  | 10  | 22  | 9   | 5        | 19  | 18   | 17  |

d) *In silico* mapped ESTs located in chromosome 5, 1, and 4

| Chromosome | 1  | 4  | 5  |
|------------|----|----|----|
| EST number | 95 | 47 | 26 |

e) Commonly differentially expressed ESTs in all three bm3-isogenic comparisons (1332/1332 bm3, 5361/5361 bm3, and F2/F2 bm3)

f) Commonly differentially expressed ESTs in all three isogenic comparisons (bm1, bm2, bm3) in F2 background

g) Commonly differentially expressed ESTs in FD, DD1, and DD2 mapping populations

(e) Text detection result after the 4th round

a) Common ESTs between SSH and microarray for each comparison

| Comparison | 1332/1332 bm3 | 5361/5361 bm3 | F2/ F2 bm1 | F2/ F2 bm2 | F2/ F2 bm3 | FD-pop | DD1-pop | DD2-pop | AS 20/ AS 21 |
|------------|---------------|---------------|------------|------------|------------|--------|---------|---------|--------------|
| EST number | 49            | 102           | 42         | 43         | 25         | 34     | 8       | 33      | 31           |

b) Differentially expressed ESTs with at least five-fold change for each comparison

| Comparison | 1332/1332 bm3 | 5361/5361 bm3 | F2/ F2 bm1 | F2/ F2 bm2 | F2/ F2 bm3 | FD-pop | DD1-pop | DD2-pop | AS 20/ AS 21 |
|------------|---------------|---------------|------------|------------|------------|--------|---------|---------|--------------|
| EST number | 18            | 90            | 25         | 30         | 83         | 42     | 78      | 42      | 80           |

c) EST homologs of the genes involved in lignin biosynthesis pathway

| Lignin gene | PAL | 4CL | C3H | CcCoAOMT | CCR | COMT | CAD |
|-------------|-----|-----|-----|----------|-----|------|-----|
| EST number  | 10  | 22  | 9   | 5        | 19  | 18   | 17  |

d) *In silico* mapped ESTs located in chromosome 5, 1, and 4

| Chromosome | 1  | 4  | 5  |
|------------|----|----|----|
| EST number | 95 | 47 | 26 |

e) Commonly differentially expressed ESTs in all three bm3-isogenic comparisons (1332/1332 bm3, 5361/5361 bm3, and F2/F2 bm3)

f) Commonly differentially expressed ESTs in all three isogenic comparisons (bm1, bm2, bm3) in F2 background

g) Commonly differentially expressed ESTs in FD, DD1, and DD2 mapping populations

(f) The final text detection result

Figure 6: A text detection example from [8].

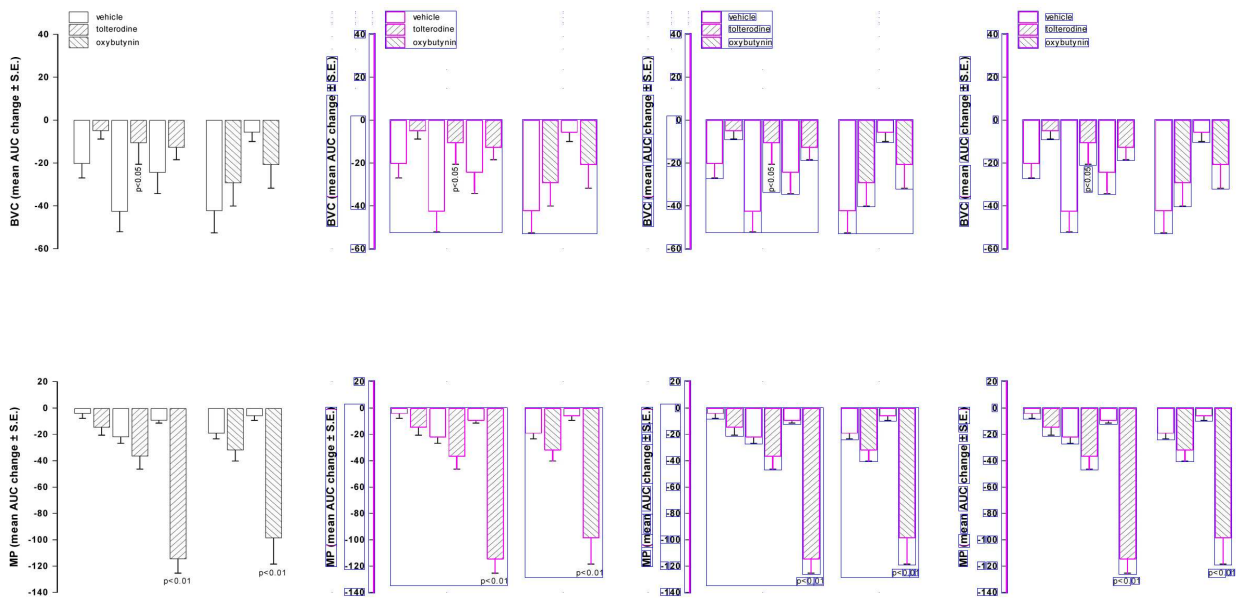

(a) The original image      (b) Text detection result (1st round)      (c) Text detection result (2nd round)      (d) Final text detection result

Figure 7: A text detection example from [1].

```
bcTopo IIIId 601 VEMSEKMDFTGLHVESLERKGSKPTTGKKVGSCKKIDGDVIDKSTFYGCSNYNTTQDFPTISKKILSKTISQKNSKKLLK
bcTopo IIIId 681 CEKTDLIKPKKCEKTFDAKLEWAKDKINPVEFN
```

(a) The original image

```
bcTopo IIIId 603 VEMSEKMDFTGLHVESLERKGSKPTTGKKVGSCKKIDGDVIDKSTFYGCSNYNTTQDFPTISKKILSKTISQKNSKKLLK
bcTopo IIIId 683 CEKTDLIKPKKCEKTFDAKLEWAKDKINPVEFN
```

(b) Text detection result after the 1st round

```
bcTopo IIIId 503 VEMSEKMDFTGLHVESLERKGSKPTTGKKVGSCKKIDGDVIDKSTFYGCSNYNTTQDFPTISKKILSKTISQKNSKKLLK
bcTopo IIIId 353 CEKTDLIKPKKCEKTFDAKLEWAKDKINPVEFN
```

(c) The final text detection result

Figure 8: A text detection example from [5].





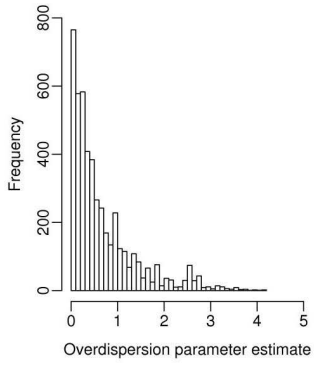

(a) The original image

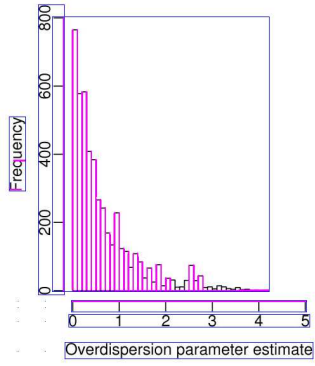

(b) Text detection result  
after the 1st round

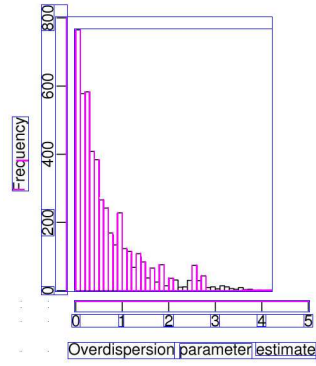

(c) Text detection result  
after the 2nd round

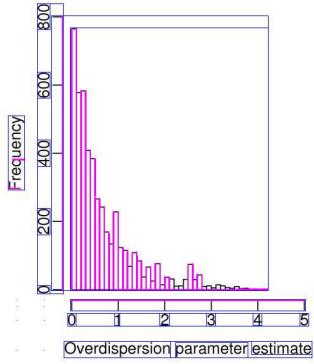

(d) Text detection result  
after the 3rd round

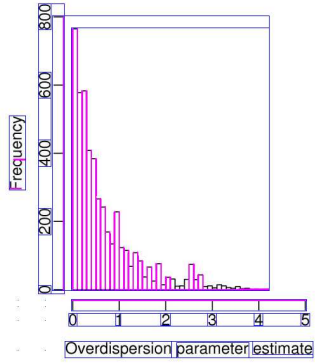

(e) Text detection result  
after the 4th round

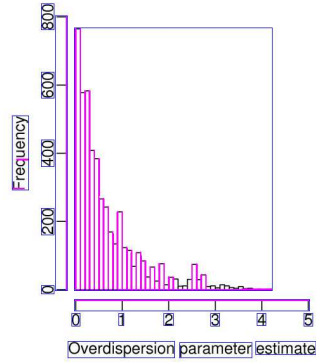

(f) The final text detection  
result

Figure 10: A text detection example from [6].

- [1] Angelico, P., Velasco, C., Guarneri, L., Sironi, G., Leonardi, A., and Testa, R. (2005). Urodynamic effects of oxybutynin and tolterodine in conscious and anesthetized rats under different cystometrographic conditions. *BMC Pharmacology*, **5**, 14–14. PMID: 16216132 PMCID: 1274333.
- [2] Doi, Y., Katafuchi, A., Fujiwara, Y., Hitomi, K., Tainer, J. A., Ide, H., and Iwai, S. (2006). Synthesis and characterization of oligonucleotides containing 2-fluorinated thymidine glycol as inhibitors of the endonuclease III reaction. *Nucleic Acids Research*, **34**(5), 1540–1551. PMID: 16547199 PMCID: 1409675.
- [3] Dumas, H., Panayiotopoulos, P., Parker, D., and Pongpaichana, V. (2006). Understanding and meeting the needs of those using growth hormone injection devices. *BMC Endocrine Disorders*, **6**, 5–5. PMID: 17034628 PMCID: 1618831.
- [4] Li, H. and Stephan, W. (2006). Inferring the demographic history and rate of adaptive substitution in drosophila. *PLoS Genetics*, **2**(10). PMID: 17040129 PMCID: 1599771.
- [5] Li, Z., Hiasa, H., and DiGate, R. (2005). Bacillus cereus DNA topoisomerase i and III: purification, characterization and complementation of escherichia coli TopoIII activity. *Nucleic Acids Research*, **33**(17), 5415–5425. PMID: 16192570 PMCID: 1236973.
- [6] Lu, J., Tomfohr, J. K., and Kepler, T. B. (2005). Identifying differential expression in multiple SAGE libraries: an overdispersed log-linear model approach. *BMC Bioinformatics*, **6**, 165–165. PMID: 15987513 PMCID: 1189357.
- [7] Nayeri, F., Aili, D., Nayeri, T., Xu, J., Almer, S., Lundstrm, I., kerlind, B., and Liedberg, B. (2005). Hepatocyte growth factor (HGF) in fecal samples: rapid detection by surface plasmon resonance. *BMC Gastroenterology*, **5**, 13–13. PMID: 15826299 PMCID: 1090571.
- [8] Shi, C., Uzarowska, A., Ouzunova, M., Landbeck, M., Wenzel, G., and Lbberstedt, T. (2007). Identification of candidate genes associated with cell wall digestibility and eQTL (expression quantitative trait loci) analysis in a flint flint maize recombinant inbred line population. *BMC Genomics*, **8**, 22–22. PMID: 17233901 PMCID: 1785377.
- [9] Wang, X., Deavers, M., Patenia, R., Bassett, R. L., Mueller, P., Ma, Q., Wang, E., and Freedman, R. S. (2006). Monocyte/macrophage and t-cell infiltrates in peritoneum of patients with ovarian cancer or benign pelvic disease. *Journal of Translational Medicine*, **4**, 30–30. PMID: 16824216 PMCID: 1550428.
- [10] Yamada, S., Gotoh, O., and Yamana, H. (2006). Improvement in accuracy of multiple sequence alignment using novel group-to-group sequence alignment algorithm with piecewise linear gap cost. *BMC Bioinformatics*, **7**, 524–524. PMID: 17137519 PMCID: 1769516.
